# Supplementary material for: Mechanochemical and thermal succinylation of softwood sawdust in presence of deep eutectic solvent to produce lignin-containing wood nanofibers
Source: Springer Nature journal article supplement (doi:10.1007/s10570-021-03973-w), 2021-06-01

Mechanochemical and thermal succinylation of softwood sawdust in presence of deep eutectic solvent to produce lignin-containing wood nanofibers

Juho Antti Sirviöa*, Erkki Isokoskia, Anu M. Kantolab, Sanna Komulainenb, Ari Ämmäläa

aFibre and Particle Engineering Research Unit, University of Oulu, P.O. Box 4300, 90014 Oulu, Finland E-mail: [juho.sirvio@oulu.fi](mailto:juho.sirvio@oulu.fi)

*bNMR Research Unit, University of Oulu, P.O.Box 3000, FIN-90014, Oulu, Finland.*











Figure S1. TEM images of WNF1











Figure S2. TEM images of WNF2











Figure S3. TEM images of WNF3


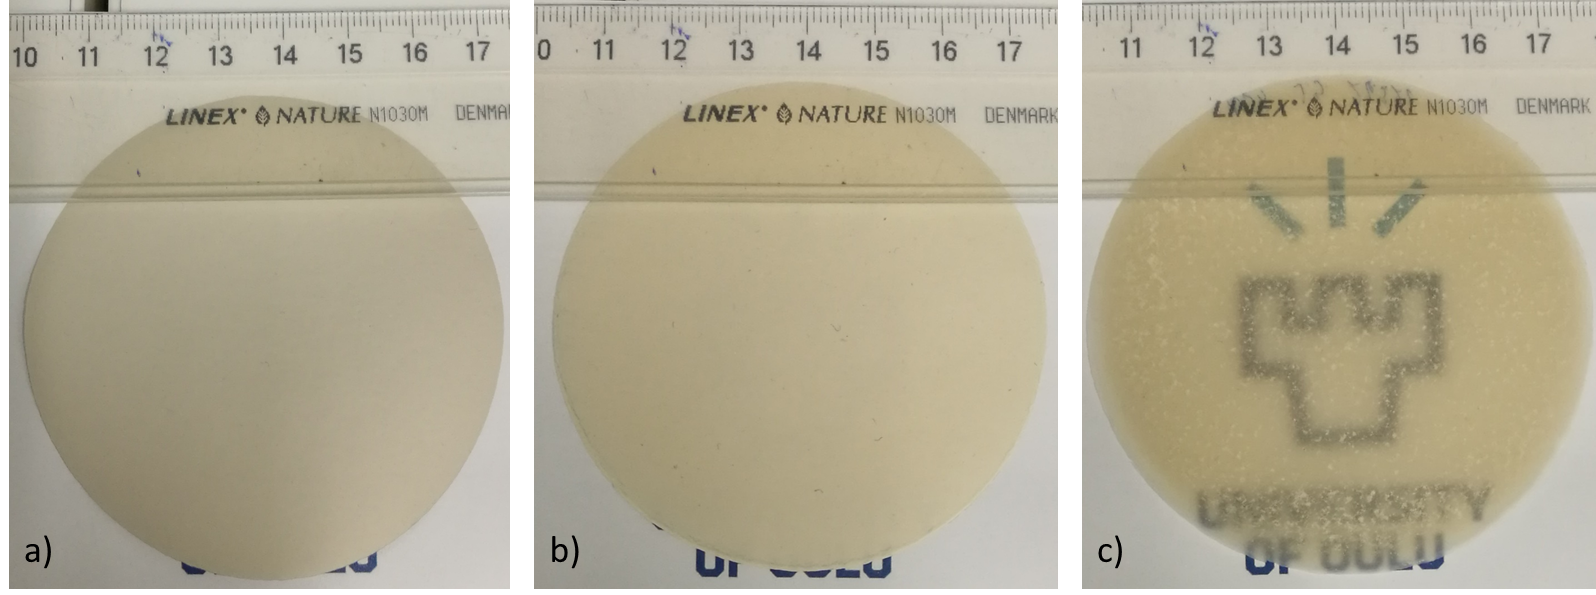


Figure S4. Photograph of the WNF films (due to the slight bending, ruler was placed on the top of the film to straighten them on the top of the background.


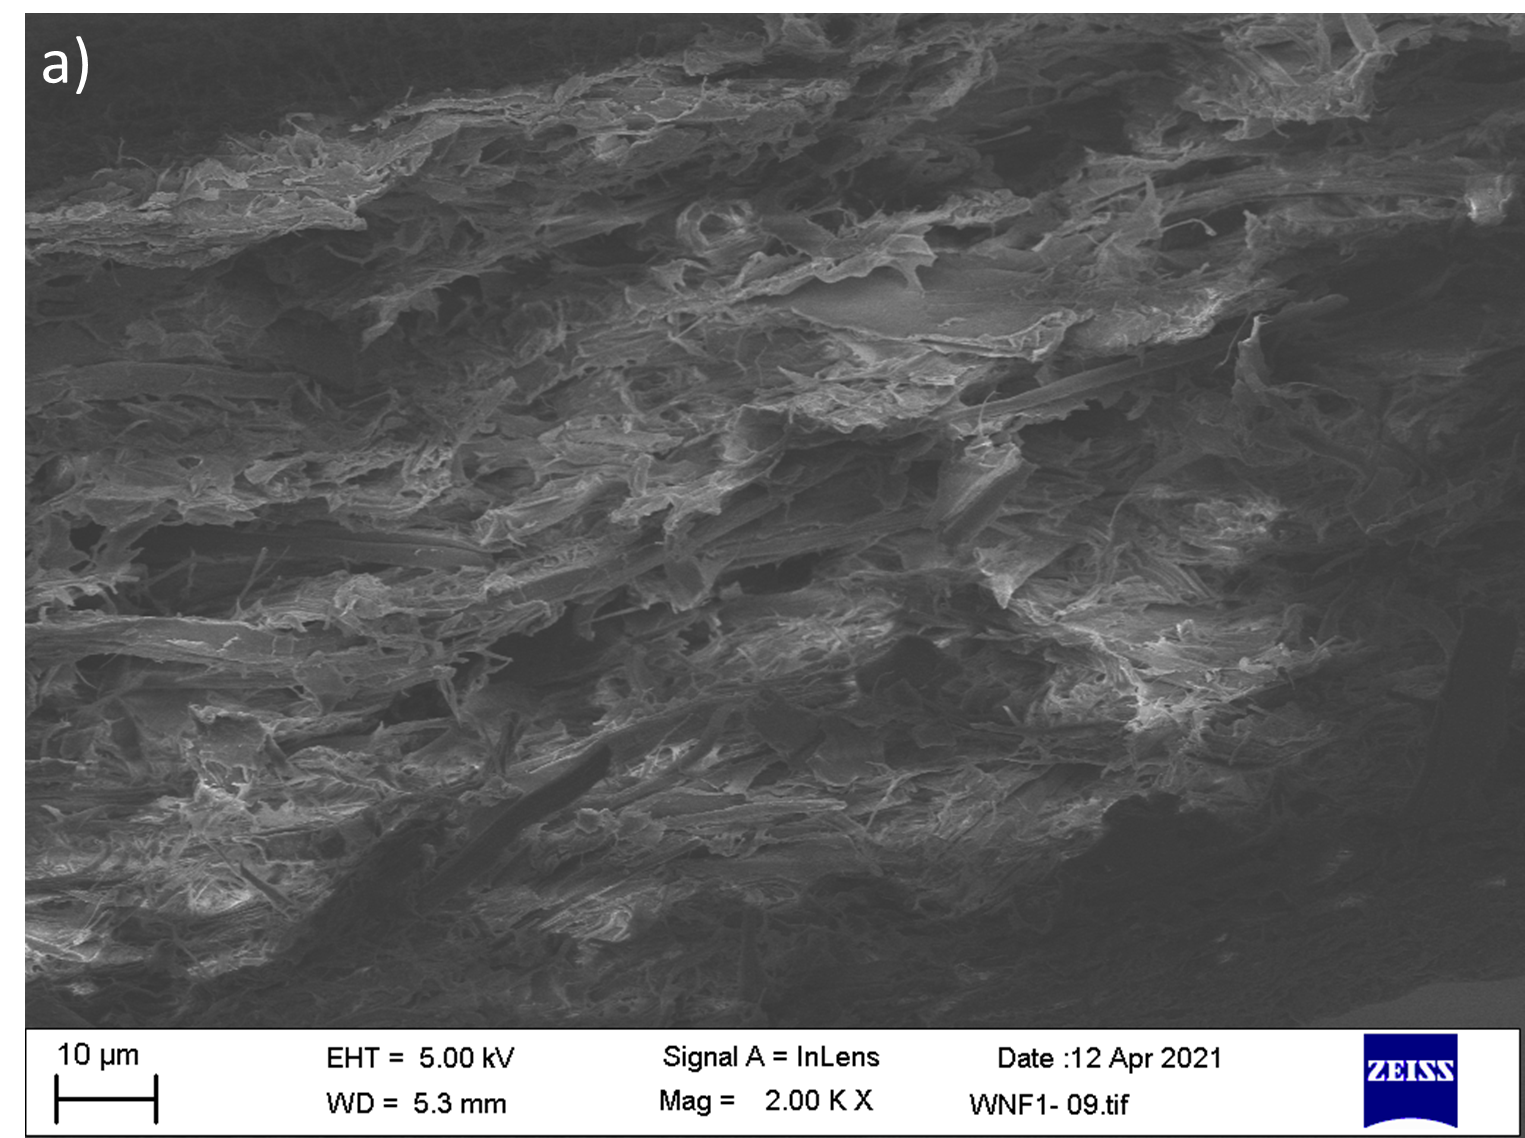


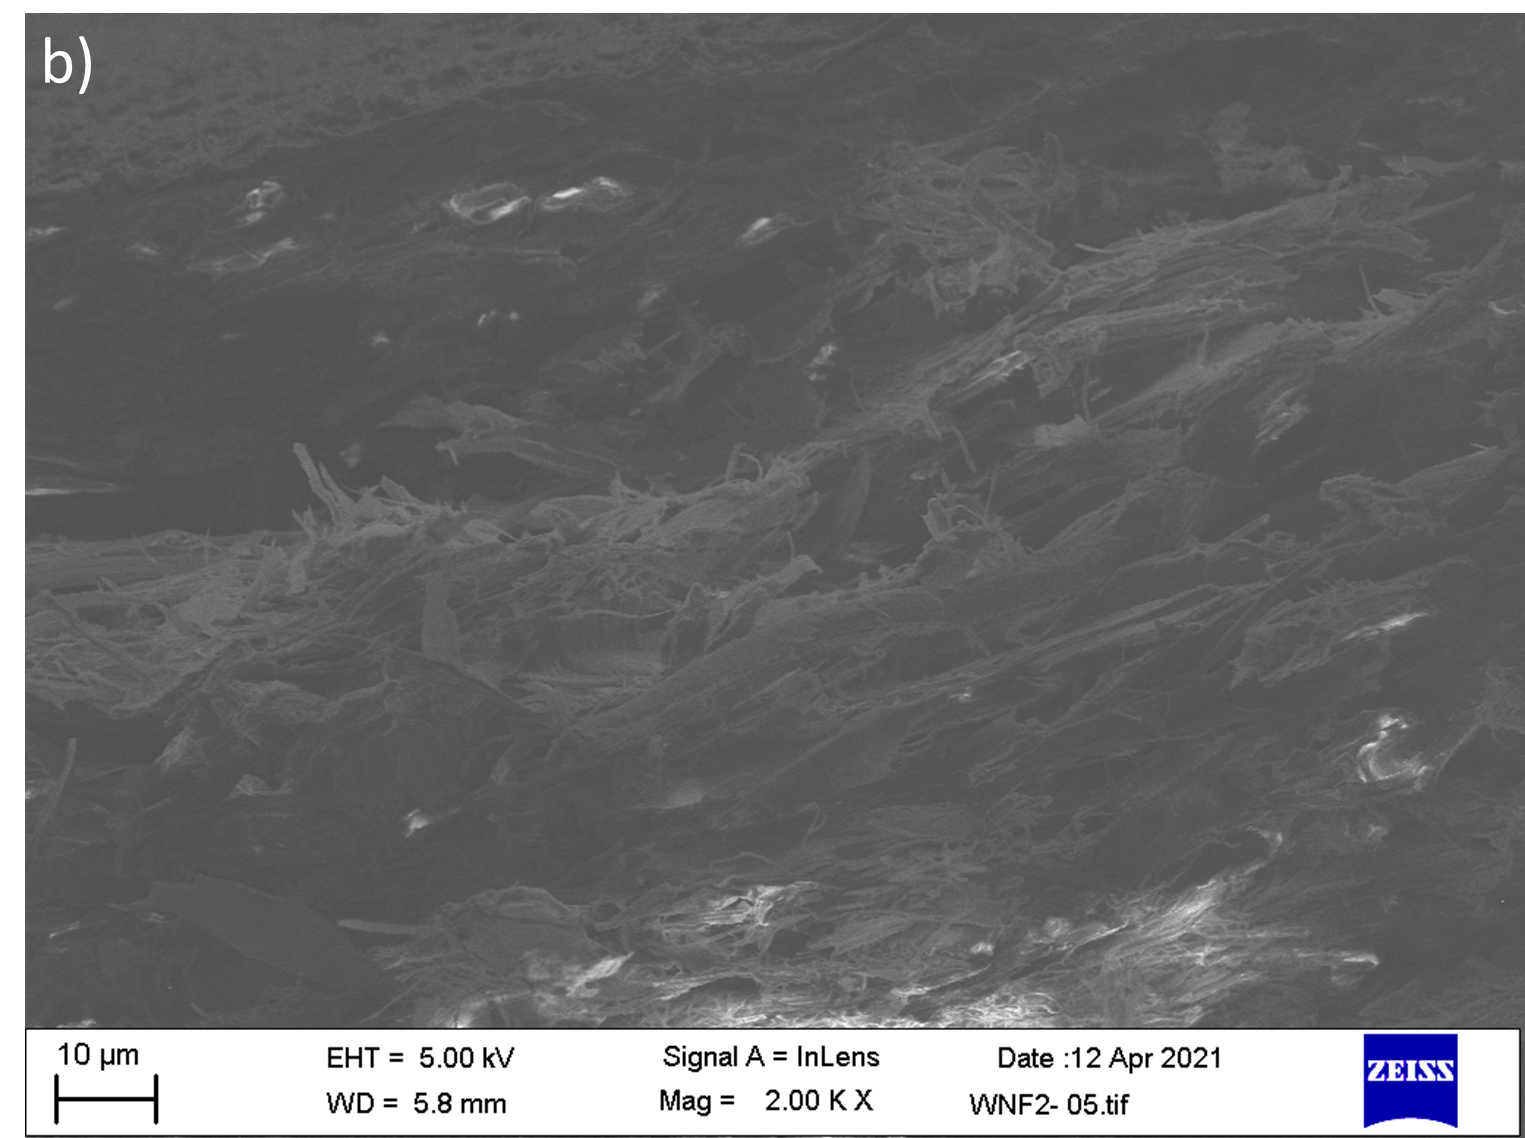


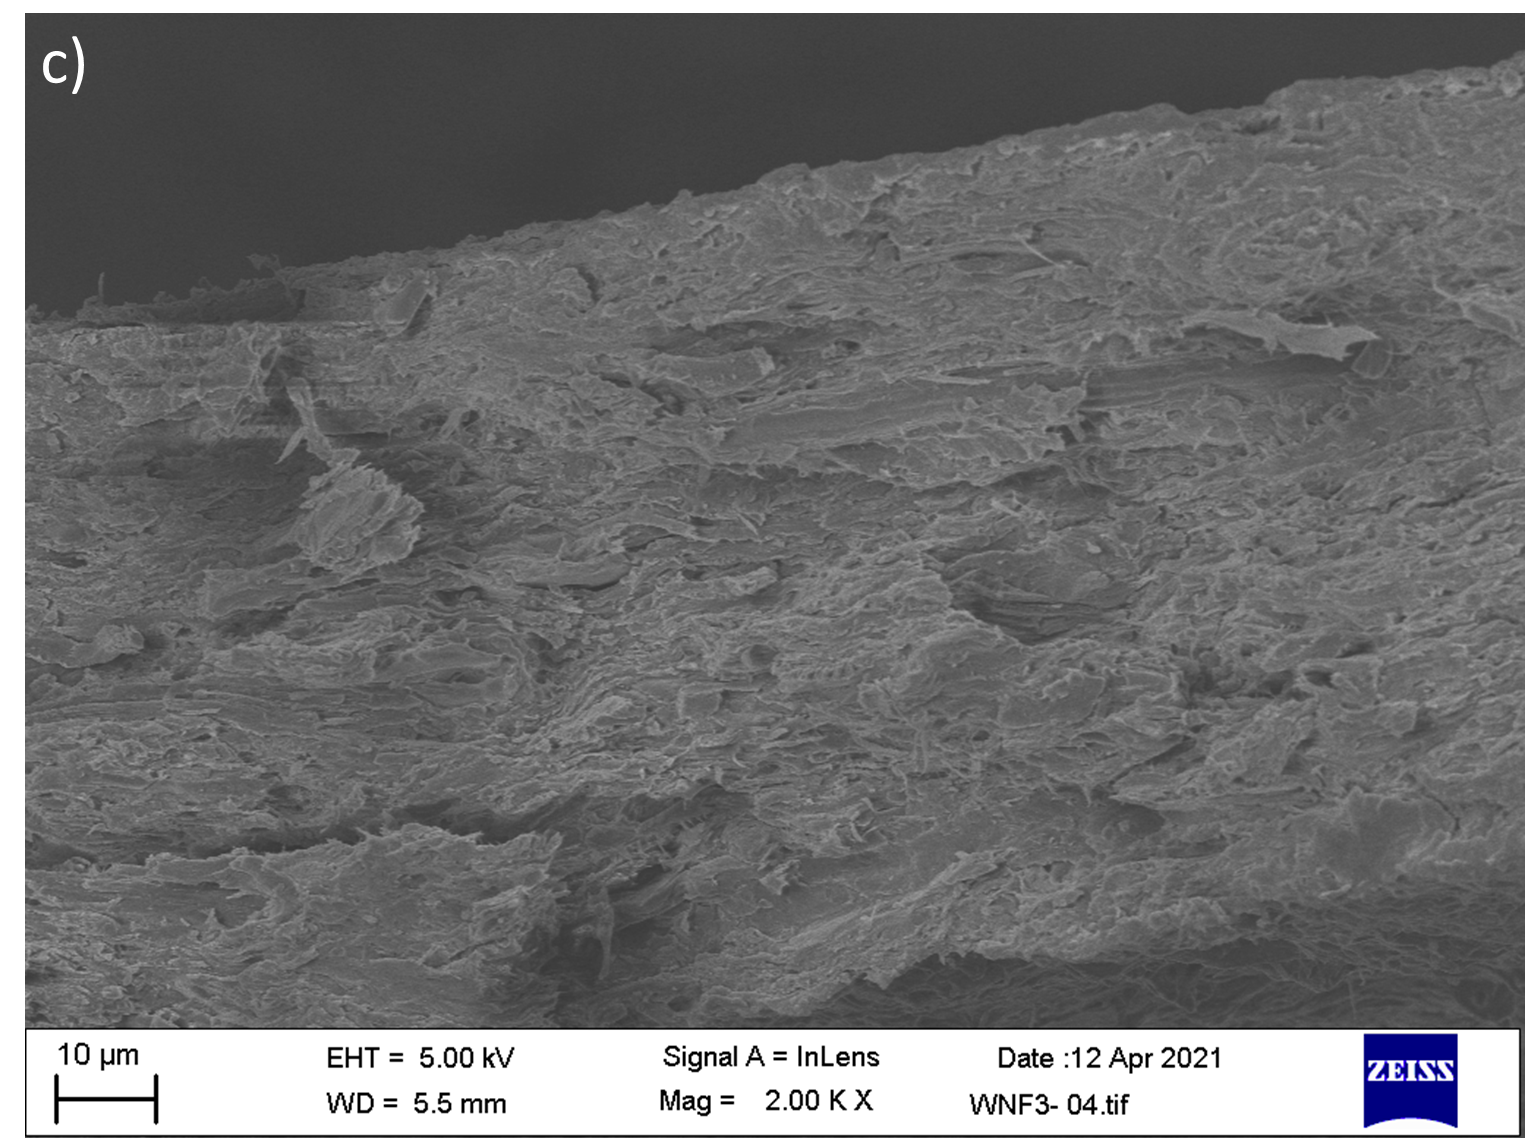

Supplement: MOESM1 [file 19219478]
